# Supplementary material
Source: HighWire-hosted journal article supplement (doi:10.1101/rna.066290.118)
Supplement: Supplemental_Legends.docx [file Supplemental_Legends.docx]

**Supplementary Figure 1.** Evaluation of predictive performance and comparison to *branchpointer*. Fraction of predictions agreeing with Mercer branchpoints for positions -18 to -45 (top) and -5 to -60 (bottom) on our test set (left) and the intersection of our test set and the *branchpointer*test set (right). A * indicates a significant difference with p < 1e-6 by a two-sided Fisher Exact test.

**Supplementary Figure 2.** PhastCons conservation signature for experimental and predicted branchpoints.

**Supplementary Figure 3.** Consensus sequence for overlap of the Taggart and predicted branchpoints. The overlap of Taggart and predicted branchpoints nearly invariantly have an A at the branchpoint position and U at the -2 position.

**Supplementary Figure 4.** Experimentally determined branchpoints display a nucleotide content signature, consistent with extended base pairing with U2 snRNA. (A, B, C) Identical to **Figure 3A-C**, except for *Mercer et al*. experimental data instead of predictions. (D) G, C nucleotide content signature for a set of 718 experimentally determined budding yeast branchpoints.

**Supplementary Figure 5.** Branchpoint sequences are correlated with their associated 5’SS sequences. (A) Differences in nucleotide content between 5’SSs associated with C branchpoints as compared to A branchpoints (top) and branchpoints without a U at the -2 position as compared to those that do (bottom). These are shown for both real 5’SS–branchpoint pairs (left) and intron length matched shuffled pairs (right). (B) Mutual information between all pairs of positions near the branchpoint and positions near the 5’SS. The marginal mutual information in bits (the sum of the corresponding row or column) for each position relative to the branchpoint and 5’SS is plotted in black and this marginal mutual information as a fraction of the entropy at each position is plotted in blue.

# Supplementary Tables

**Table S1.** Performance metrics for LaBranchoR and *branchpointer*.Area under the precision-recall (auPRC) and receiver-operator (auROC) curve statistics for *branchpointer* (BPTR)and LaBranchoR (LBR). ‘Mercer’ refers to all Mercer high confidence sites. ‘Test Intersect’ is the intersection of our test set and the *branchpointer* test set. ‘Taggart’ is the set of Taggart et al. 2017 branchpoints on chromosome 1-4.

| Test Set | -18 to -45 from 3’SS | | | | | All Positions | | | |
| --- | --- | --- | --- | --- | --- | --- | --- | --- | --- |
| metric | auPRC | | auROC | | auPRC | | | auROC | |
| Method | BPTR | LBR | BPTR | LBR | BPTR | | LBR | BPTR | LBR |
| Mercer | 0.712 | 0.733 | 0.927 | 0.956 | 0.645 | | 0.687 | 0.908 | 0.971 |
| Test Intersect | 0.617 | 0.784 | 0.865 | 0.975 | 0.476 | | 0.694 | 0.806 | 0.978 |
| Taggart | 0.446 | 0.534 | 0.855 | 0.907 | 0.389 | | 0.482 | 0.872 | 0.844 |

**Supplementary Table 2.** Weak branchpoints play a role in alternative splicing. ‘Up SE’ correspond to branchpoints upstream of a conditionally skipped exon and ‘Down SE’ corresponds to branchpoints in introns downstream of conditionally skipped exons. ‘Retained’ refers to conditionally retained introns. Columns 2 and 3 refer to the fraction of branchpoints associated with each alternative splicing event. The enrichment and associated p-value (determined by a two-sided Fisher exact test) correspond to the ratio of columns 3 and 2.

| Event | A at BP | C at BP | Enrich | P-value |
| --- | --- | --- | --- | --- |
| Up SE | 0.1199 | 0.1452 | 1.210 | 1e-5 |
| Down SE | 0.1093 | 0.0990 | 0.906 | 0.062 |
| Retained | 0.0308 | 0.0727 | 2.356 | 8e-39 |

| Event | U at -2 | Not U at -2 | Enrich | P-value |
| --- | --- | --- | --- | --- |
| Up SE | 0.1179 | 0.1311 | 1.1120 | 9e-13 |
| Down SE | 0.1111 | 0.1003 | 0.902 | 6e-10 |
| Retained | 0.0294 | 0.0406 | 1.380 | 5e-28 |

# Additional Files

**Additional File 1.** Genome-wide branchpoint predictions. A bed file of branchpoint predictions for all introns in protein coding genes in the Gencode v19 annotations. Each entry corresponds to the nucleotide with highest predicted probability of being a branchpoint for each 3’SS.

**Additional File 2.** Genome-wide branchpoint probabilities. Similar to **Additional File 1**, except contains branchpoint probabilities for all 70 nucleotides upstream of each 3’SS.

**Additional File 3.** Genome-wide *in silico* mutagenesis scores. Mutagenesis scores for all possible single nucleotide polymorphisms in the 70 nucleotides upstream of all 3’SSs in protein coding genes in the Gencode v19 annotations.
